# Supplementary material for: BET bromodomain inhibitors suppress EWS-FLI1-dependent transcription and the IGF1 autocrine mechanism in Ewing sarcoma
Source: PubMed Central journal article supplement (PMC5190040; doi:10.18632/oncotarget.9762), 2016-06-01
Supplement: oncotarget-07-43504-s001.pdf [file oncotarget-07-43504-s001.pdf]

## BET bromodomain inhibitors suppress EWS-FLI1-dependent transcription and the IGF1 autocrine mechanism in Ewing sarcoma

### Supplementary Materials

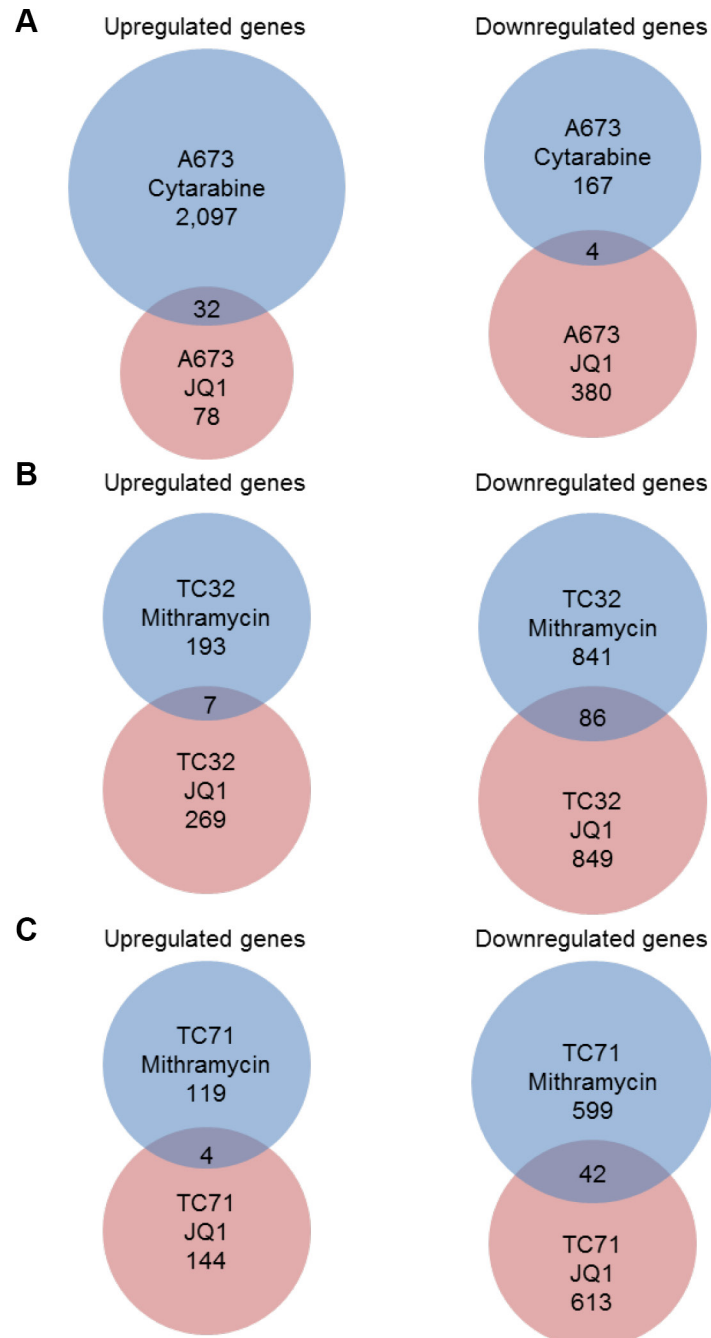

**Supplementary Figure S1: Comparison of global gene expression following JQ1 treatment or chemotherapy drugs. (A–C)** Venn diagrams summarize the genes that were differentially or commonly affected by JQ1, cytarabine (GEO: GSE6930) or mithramycin (GEO: GSE25127). Genes changed by more than 2 fold were selected for analyses.

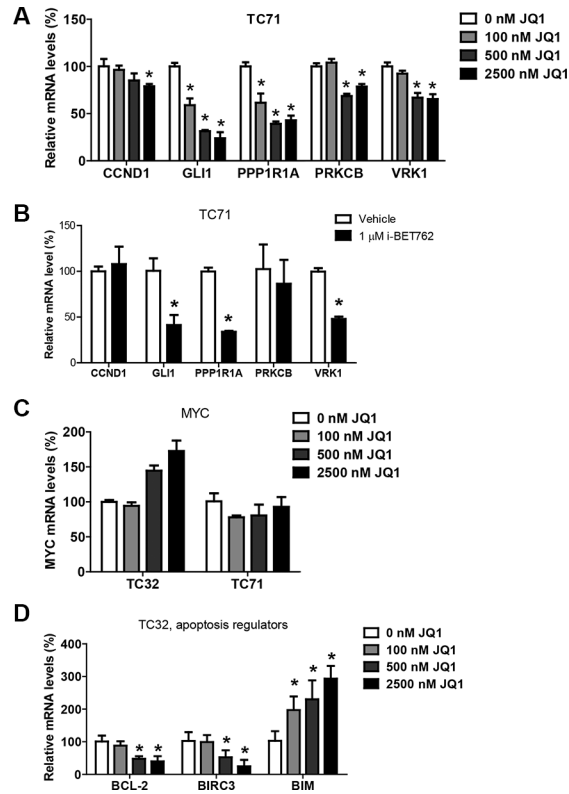

**Supplementary Figure S2: BET inhibition represses expression of EWS-FLI1 target genes.** (A) Expression of EWS-FLI1 target genes in TC71 cells treated with JQ1 at indicated concentrations or (B) 1  $\mu$ M i-BET762 for 24 hours, as assessed by qRT-PCR. (C) Expression of MYC in TC32 and TC71 cells treated as described above. (D) Expression of apoptotic regulators in TC32 cells treated as described above. \* $p < 0.05$  by Student's *t*-test compared with control samples.

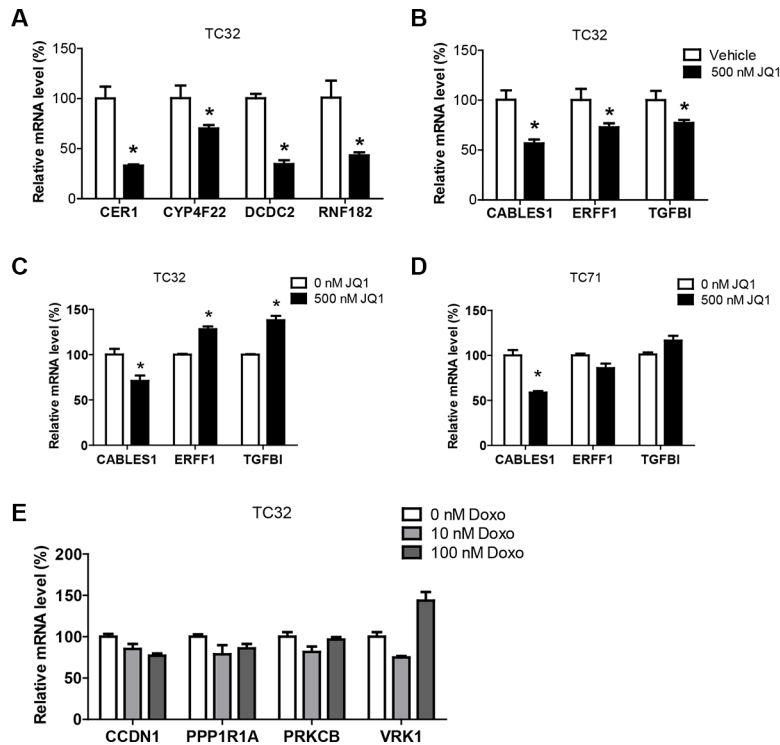

**Supplementary Figure S3: JQ1 but not doxorubicin selectively suppresses EWS-FLI1-activated genes.** (A) TC32 cells were treated with 500 nmol/L JQ1 for 4 hours. Expression of EWS-FLI1-activated and (B) repressed genes were determined by qRT-PCR. Actin was used as loading control. \* $p < 0.05$  by Student's *t*-test compared with control samples. (C) TC32 or (D) TC71 cells were treated with 500 nmol/L JQ1 for 24 hours. Expression of selected genes repressed by EWS-FLI1 were determined by qRT-PCR. (E) TC32 cells were treated with doxorubicin at 10 or 100 nmol/L for 24 hours. Expression of selected EWS-FLI1 target genes were shown by qRT-PCR.

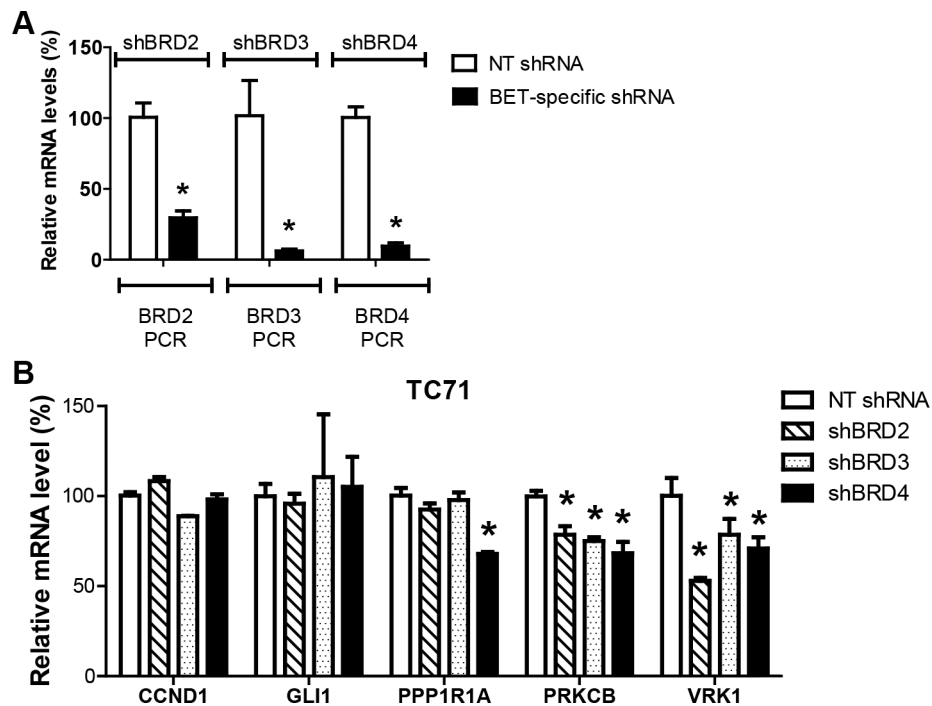

**Supplementary Figure S4: Knockdown of BET genes downregulates EWS-FLI1 target genes.** (A) Expression of BRD2, BRD3 and BRD4 in TC71 cells infected with lentivirus directing expression of shRNA sequences specific to BET genes, as measured by qRT-PCR. Knockdown efficiency in TC32 cells was similar (data not shown). (B) Expression of EWS-FLI1 in TC71 cells following knockdown of individual BET genes. \* $p < 0.05$  by Student's  $t$ -test compared with control samples.

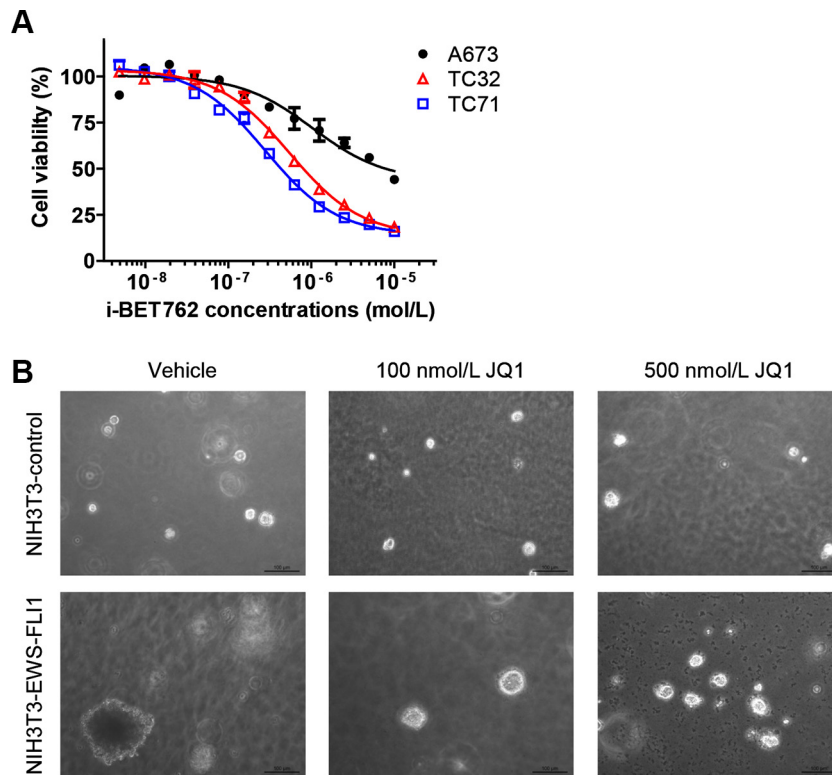

**Supplementary Figure S5: BET inhibition impairs Ewing sarcoma cell viability and blocks NIH3T3 transformation.** (A) Dose response curves of i-BET762 in Ewing sarcoma cell lines generated as described in Figure 5A. (B) NIH3T3 cells were infected with control lentivirus or lentivirus directing expression of EWS-FLI1. Following puromycin selection, cells were plated at 10,000 cells per well in 0.35% agar in 6-well plates. Cells were treated with 100 or 500 nmol/L JQ1 for 5 days and further incubated for 2 weeks in the absence of JQ1. Representative images are presented. Bars shown in the images represent 100  $\mu$ m.

**Supplementary Table S1: Sequences of qRT-PCR primers used in this study**

| Primer sequences           |         |                             |
|----------------------------|---------|-----------------------------|
| ACTIN                      | forward | 5'-TCGTGCGTGACATTAAGGA      |
|                            | reverse | 5'-AGGAAGGAAGGCTGGAAGAG     |
| CCND1                      | forward | 5'-CCGCTGGCCATGAACTACCT     |
|                            | reverse | 5'-ACGAAGGTCTGCGCGTGT       |
| GLI1                       | forward | 5'-CTGGAGAACCTTAGGCTGGA     |
|                            | reverse | 5'-CGGCTGACTGTGTAAGCAGA     |
| PPP1R1A                    | forward | 5'-GCAACGGAAGAAGATGACAAG    |
|                            | reverse | 5'-AGGTTCTCTCCTTGCTGCT      |
| PRKCB                      | forward | 5'-CTTCAAGCAGCCACCTTCT      |
|                            | reverse | 5'-TCCCCGAAGCCCCAGATG       |
| VRK1                       | forward | 5'-CCAACGAGCTGCAAAACC       |
|                            | reverse | 5'-TGTCATGTAGACCAGACCCC     |
| BCL2                       | forward | 5'-ATGTGTGTGGAGAGCGTCAACC   |
|                            | reverse | 5'-TGAGCAGAGTCTTCAGAGACAGCC |
| BIRC3                      | forward | 5'-TTGAACAGCTGCTATCCACATC   |
|                            | reverse | 5'-TCCAGGTTCAAAATGGATAATTG  |
| BIM                        | forward | 5'-CACAAACCCCAAGTCTCCTT     |
|                            | reverse | 5'-TTCAGCCTGCCTCATGGAA      |
| CER1                       | forward | 5'-GAAATGCGGGTCTGTTCATT     |
|                            | reverse | 5'-CAGGCAAACAGTGAGAGCAG     |
| CYP4F221                   | forward | 5'-TTGGATGCTGTTCAATTTGG     |
|                            | reverse | 5'-GGCAGCTGAGTCAGATCGT      |
| DCDC2                      | forward | 5'-GAATTCACAAGAAACCATTCCAA  |
|                            | reverse | 5'-CCCCGTGTTTCAGACCTC       |
| RNF182                     | forward | 5'-CCGTTCTTAGAGGCAGGACTT    |
|                            | reverse | 5'-GGCCAGCTCTAGCAAACCTA     |
| ERRF1                      | forward | 5'-ACCCACTGAAGTAGCTCATCG    |
|                            | reverse | 5'-TTCCATCTGAGTCTAACGTACCC  |
| TGFBI                      | forward | 5'-CGAGTGCTGTCCTGGATATG     |
|                            | reverse | 5'-CCCAGGGTCTCGTAAAGGTT     |
| CABLES1                    | forward | 5'-CACCGCAGCCTCTCCATA       |
|                            | reverse | 5'-GGGGTCATCCAAGAGATTTG     |
| EWS-FLI1 primer set 1 [35] | forward | 5'-TAGTTACCCACCCAAACTGGAT   |
|                            | reverse | 5'-GGGCCGTTGCTCTGTATTCTTAC  |
| EWS-FLI1 primer set 2 [36] | forward | 5'-TCCTACAGCCAAGCTCCAAGTC   |
|                            | reverse | 5'-GAATTGCCACAGCTGGATCTGC   |
| EWS-FLI1 primer set 3      | forward | 5'-CGACTAGTTATGATCAGAGCAGT  |
|                            | reverse | 5'-CCGTTGCTCTGTATTCTTACTGA  |
